# Supplementary material for: Occupational exposure to endotoxins and lung cancer risk: results of the ICARE Study
Source: PubMed Central journal article supplement — Occup Environ Med. 2017 May 10;74(9):667–79. doi: 10.1136/oemed-2016-104117 (PMC5574383; doi:10.1136/oemed-2016-104117), 2017-05-10
Supplement: oemed-2016-104117supp001.pdf [file oemed-2016-104117supp001.pdf]

**Supplementary Table 1.** Association between Lung Cancer and Exposure to Endotoxins stratified by Histology

|                               | <i>Squamous Cell</i> |                   |                                       | <i>Small Cell</i> |                                       |                   | <i>Adenocarcinoma</i>                 |                   |                                       | <i>Large cell carcinoma</i> |                                       |  | <b>P-value Homogeneity</b> |
|-------------------------------|----------------------|-------------------|---------------------------------------|-------------------|---------------------------------------|-------------------|---------------------------------------|-------------------|---------------------------------------|-----------------------------|---------------------------------------|--|----------------------------|
|                               | <b>Controls</b><br>N | <b>Cases</b><br>N | <b>OR<sup>a</sup></b><br><b>95%CI</b> | <b>Cases</b><br>N | <b>OR<sup>a</sup></b><br><b>95%CI</b> | <b>Cases</b><br>N | <b>OR<sup>a</sup></b><br><b>95%CI</b> | <b>Cases</b><br>N | <b>OR<sup>a</sup></b><br><b>95%CI</b> | <b>Cases</b><br>N           | <b>OR<sup>a</sup></b><br><b>95%CI</b> |  |                            |
| <b>Exposure to Endotoxins</b> |                      |                   |                                       |                   |                                       |                   |                                       |                   |                                       |                             |                                       |  |                            |
| <i>Never<sup>b</sup></i>      | 2895                 | 726               | 1.00 Reference                        | 358               | 1.00 Reference                        | 1008              | 1.00 Reference                        | 201               | 1.00 Reference                        |                             |                                       |  |                            |
| <i>Ever<sup>c</sup></i>       | 660                  | 180               | 0.92 [0.72-1.17]                      | 71                | 0.78 [0.56-1.1]                       | 137               | 0.65 [0.51-0.83]                      | 45                | 1.13 [0.76-1.66]                      |                             |                                       |  | 0.06                       |
| <i>Weakly</i>                 | 310                  | 107               | 1.18 [0.87-1.6]                       | 47                | 0.99 [0.66-1.5]                       | 99                | 0.96 [0.72-1.27]                      | 31                | 1.5 [0.95-2.33]                       |                             |                                       |  | 0.63                       |
| <i>Highly</i>                 | 336                  | 67                | 0.63 [0.44-0.91]                      | 24                | 0.61 [0.36-                           | 38                | 0.37 [0.25-0.55]                      | 14                | 0.78 [0.41-1.50]                      |                             |                                       |  | 0.001                      |

Abbreviation: OR, Odds ratio; CI indicates confidence interval; Comprehensive smoking index (CSI).

† Weakly exposed group included Cultivation, Agri-transformation/agri-food excluding Grain transport, Waste collection and treatment, Sawmills, Wool industry, Medical/veterinary/research sectors, Cigarette/cigar manufacture and Paper factory.

‡ Highly exposed group included Dairy farms, Cattle, Poultry, Pigs, work with grains and transport and cotton industry.

<sup>a</sup> OR adjusted for age at interview, department, sex, Comprehensive smoking index (CSI), number of job periods, education and occupational exposure to asbestos. The never exposed to endotoxins are always the reference group.

<sup>b</sup> Never means having no job in Work Environment Group potentially exposed to endotoxins.

<sup>c</sup> Ever means having held at least one job in Work Environment Group potentially exposed to endotoxins.

**Supplementary Table 2. Association between Lung Cancer and Exposure to Endotoxins stratified by**

| Exposure to              | <i>No History of asthma</i> |          |                 |             | <i>With History of asthma*</i> |          |                 |                            |
|--------------------------|-----------------------------|----------|-----------------|-------------|--------------------------------|----------|-----------------|----------------------------|
|                          | Cases                       | Controls | OR <sup>a</sup> | 95%CI       | Cases                          | Controls | OR <sup>a</sup> | 95%CI                      |
|                          | N                           | N        |                 |             | N                              | N        |                 |                            |
| <i>Never<sup>b</sup></i> | 1677                        | 2387     | 1.00            | Reference   | 71                             | 134      | 1.00            | Reference                  |
| <i>Ever<sup>c</sup></i>  | 300                         | 537      | 0.75            | [0.61-0.92] | 7                              | 40       | 0.36            | [0.1-1.26]                 |
|                          |                             |          |                 |             |                                |          |                 | P-value <sup>§</sup> =0.2  |
| <i>Weakly Exposed</i>    | 193                         | 247      | 1.04            | [0.8-1.34]  | 3                              | 20       | 0.76            | [0.13-4.37]                |
|                          |                             |          |                 |             |                                |          |                 | P-value <sup>§</sup> =0.26 |
| <i>Highly exposed</i>    | 100                         | 279      | 0.46            | [0.34-0.63] | 4                              | 20       | 0.22            | [0.04-1.05]                |
|                          |                             |          |                 |             |                                |          |                 | P-value <sup>§</sup> =0.58 |

Abbreviation: OR. Odds ratio; CI indicates confidence interval; CSI.Comprehensive smoking index.

\* History of asthma without COPD

† Weakly exposed group included Cultivation, Agri-transformation/agri-food excluding Grain transport, Waste collection and treatment, Sawmills, Wool industry, Medical/veterinary/research sectors, Cigarette/cigar manufacture and Paper factory.

‡ Highly exposed group included Dairy farms, Cattle, Poultry, Pigs, work with grains and transport and cotton industry.

<sup>a</sup> OR adjusted for age at interview, department, sex, Comprehensive smoking index (CSI), number of job periods, education and occupational exposure to asbestos. The never exposed to endotoxins are always the reference group.

<sup>b</sup> Never means having no job in Work Environment Group potentially exposed to endotoxins.

<sup>c</sup> Ever means having held at least one job in Work Environment Group potentially exposed to endotoxins.

<sup>§</sup> P-value for interaction Between Exposure to Endotoxins and the corresponding History (using the likelihood ratio test).
